# Supplementary material
Source: publisher figshare collection journal article supplement (https://gsajournals.figshare.com/articles/dataset/_/14456289)

Pt\_XM\_01000001\_1.hub

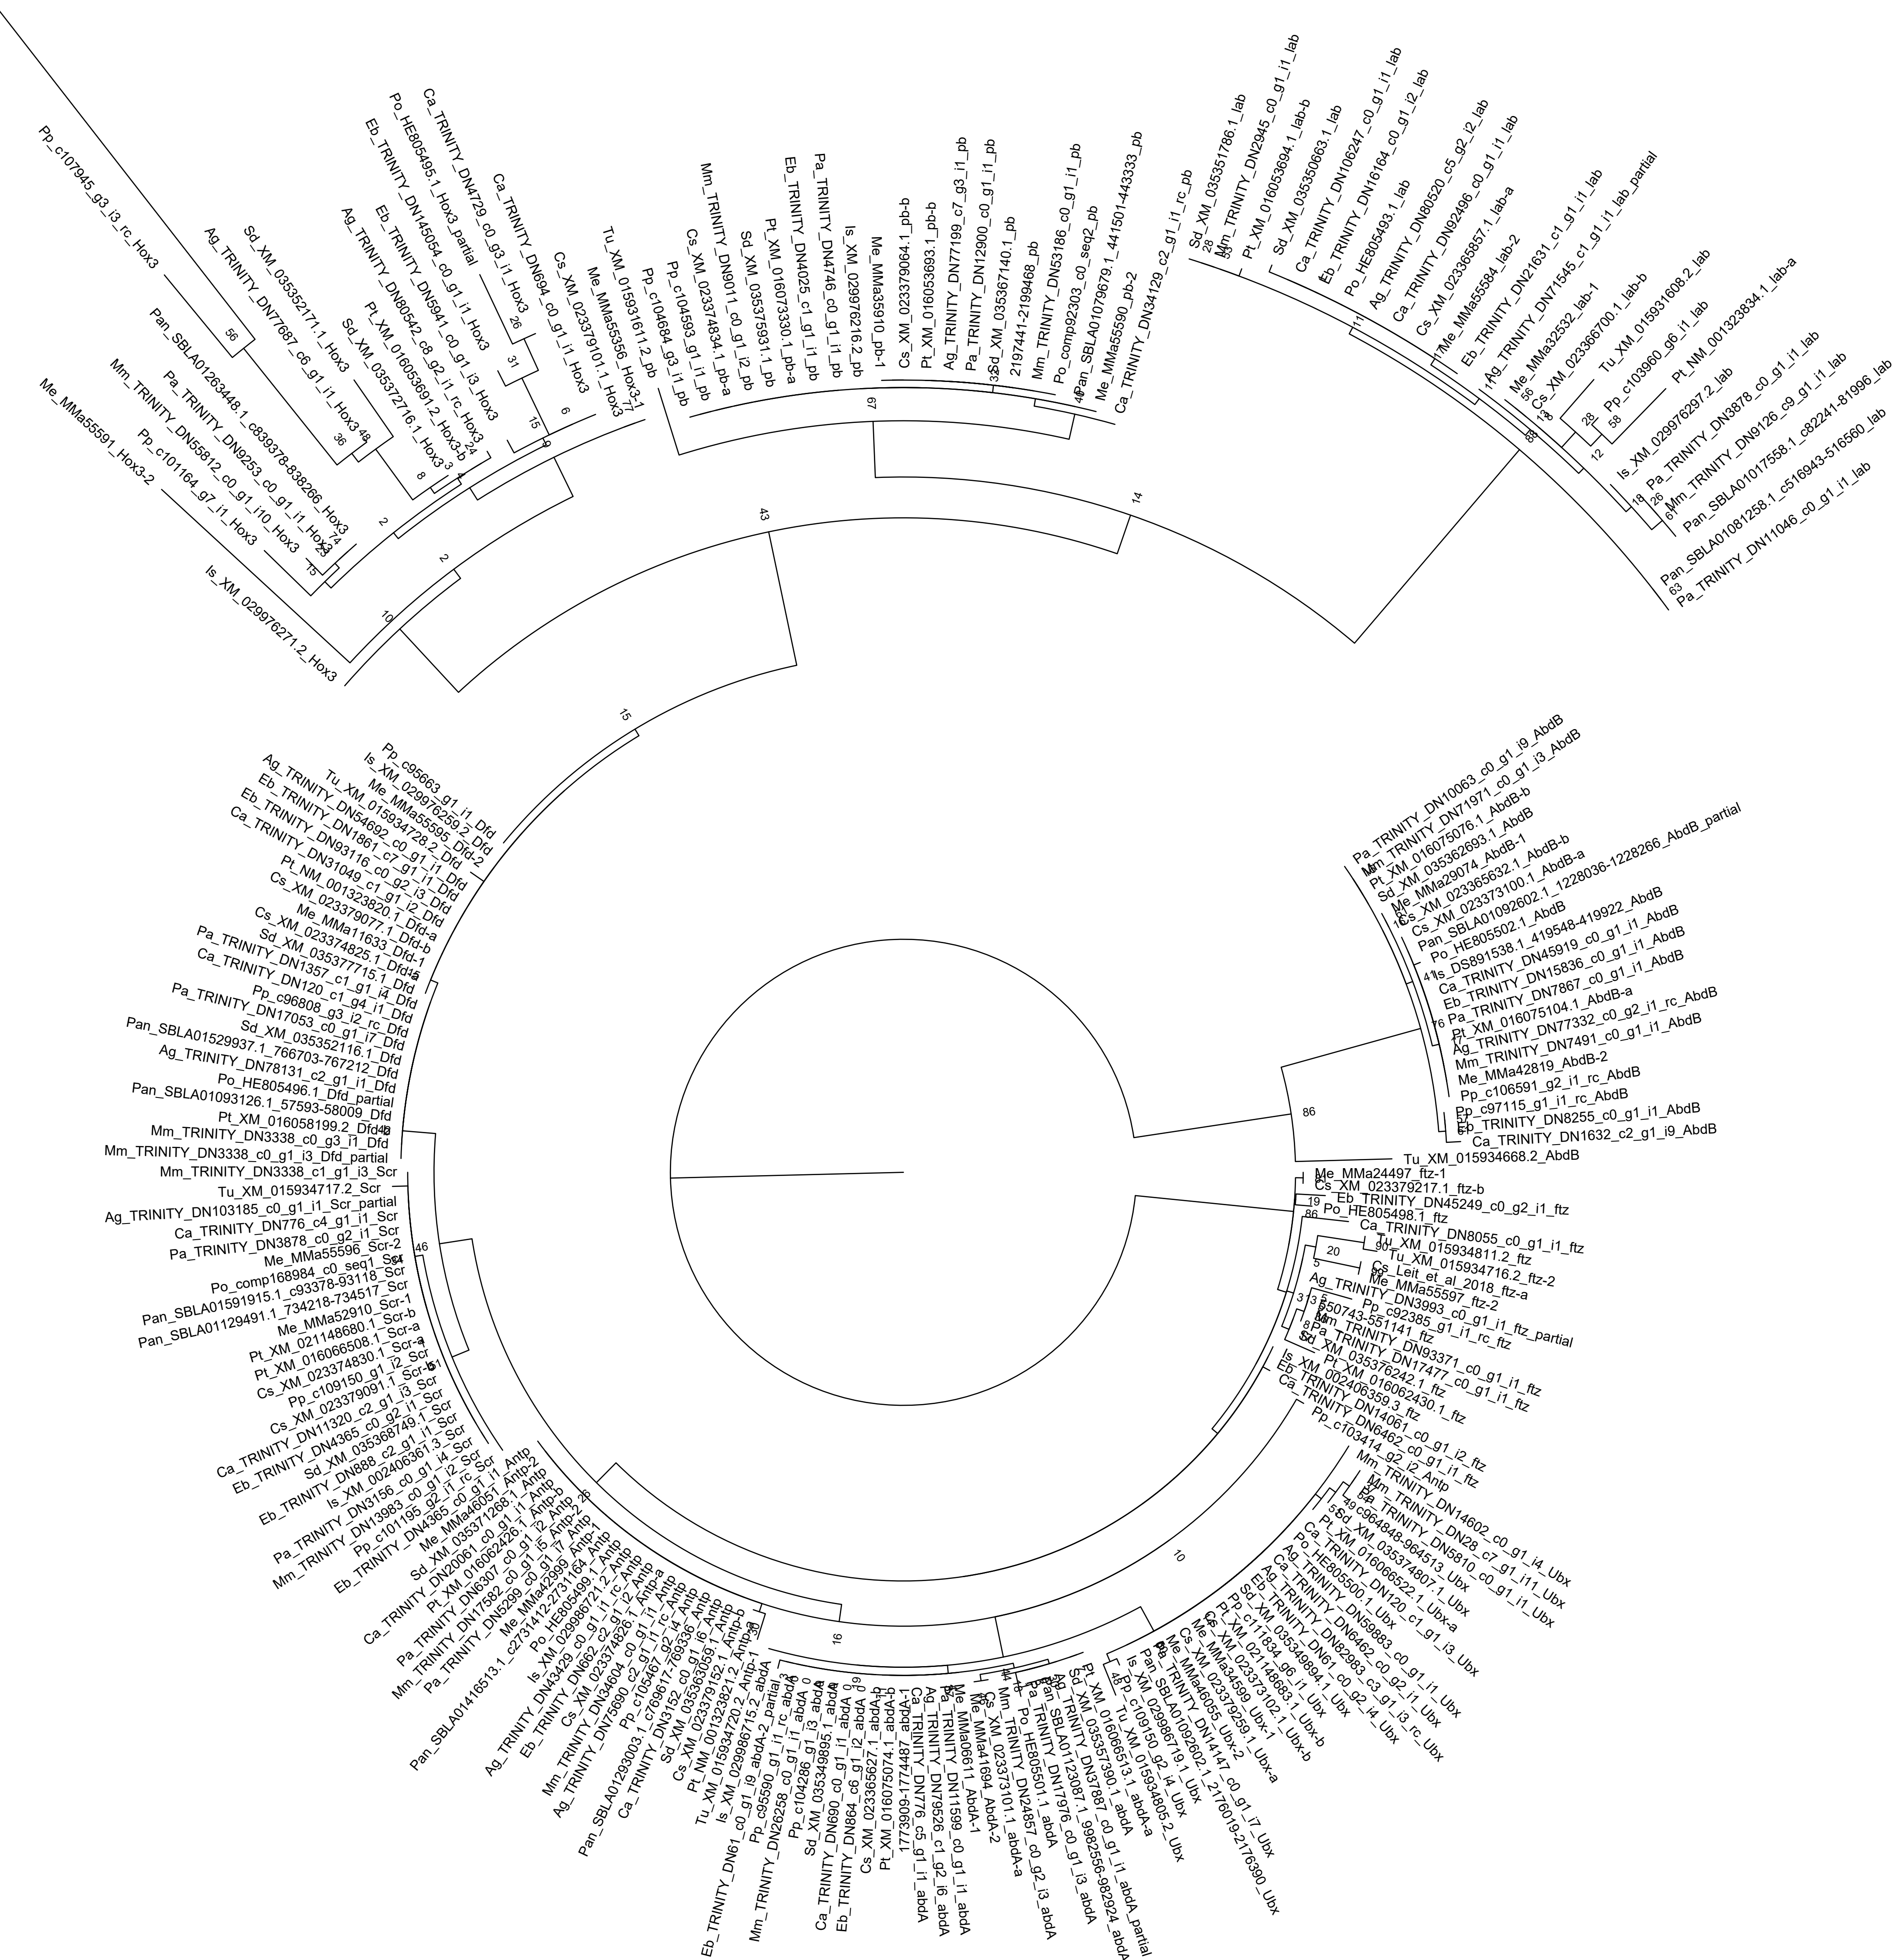

Supplement: Supplementary file 2 [file 1]

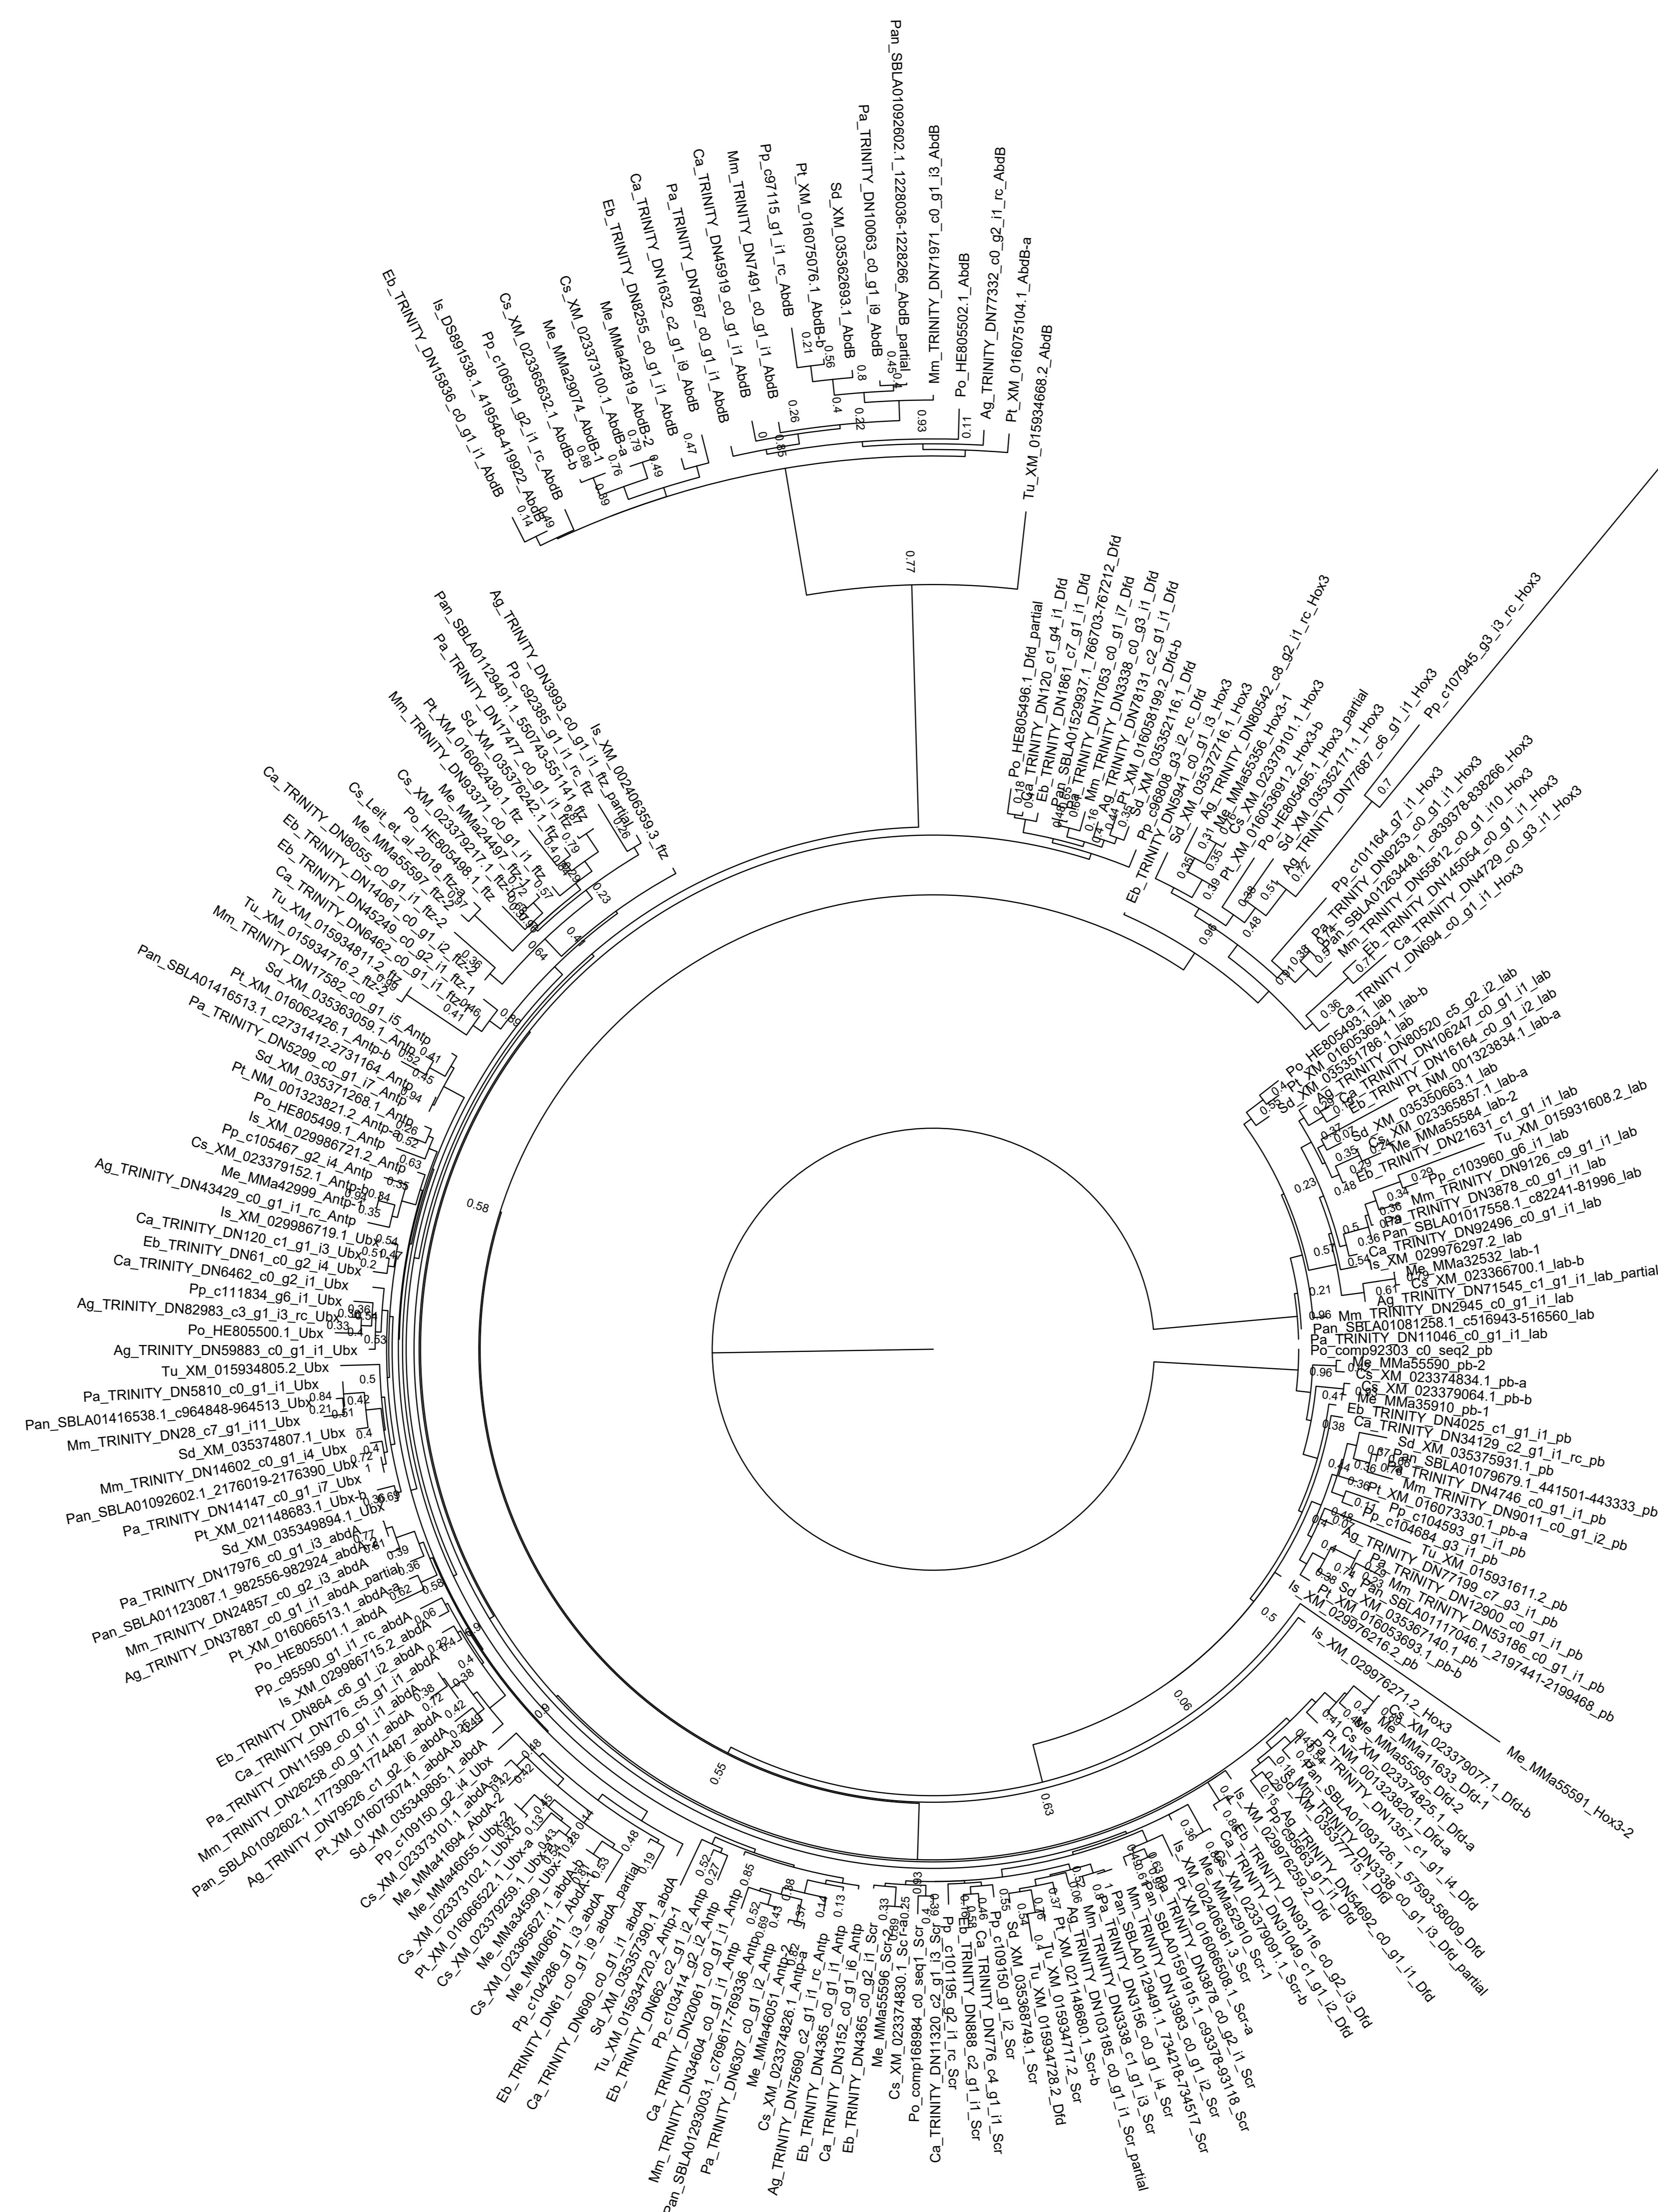

Supplement: Supplementary file 3 [file 1]
